# Supplementary material
Source: HighWire-hosted journal article supplement (https://erj.ersjournals.com/content/56/1/1902413)
Supplement: inline-supplementary-material-1 [file inline-supplementary-material-1.pdf]

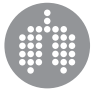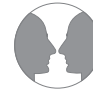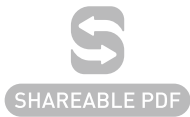

# Meaningful survival benefit for single lung transplantation in idiopathic pulmonary fibrosis patients over 65 years of age

Peter Riddell , Jana Kleinerova, Donna Eaton, David G. Healy, Hossein Javadpour, Jim F. McCarthy, Lars Nolke, Karen C. Redmond and Jim J. Egan

**Affiliation:** National Heart and Lung Transplant centre, Mater Misericordiae University Hospital, Dublin, Ireland.

**Correspondence:** Jim J. Egan, National Heart and Lung Transplant centre, Mater Misericordiae University Hospital, Dublin, Ireland. E-mail: [jegan@mater.ie](mailto:jegan@mater.ie)

 @ERSpublications

**This study demonstrates a clinically meaningful survival benefit of lung transplantation for IPF patients aged  $\geq 65$  years** <http://bit.ly/39pWH2h>

**Cite this article as:** Riddell P, Kleinerova J, Eaton D, *et al.* Meaningful survival benefit for single lung transplantation in idiopathic pulmonary fibrosis patients over 65 years of age. *Eur Respir J* 2020; 56: 1902413 [<https://doi.org/10.1183/13993003.02413-2019>].

This single-page version can be shared freely online.

To the Editor:
